# Supplementary material for: n-Butene Synthesis in the Dimethyl Ether-to-Olefin Reaction over Zeolites
Source: MDPI journal article supplement (doi:10.3390/catal11060743), 2021-06-17
Supplement: s1 [file s1]

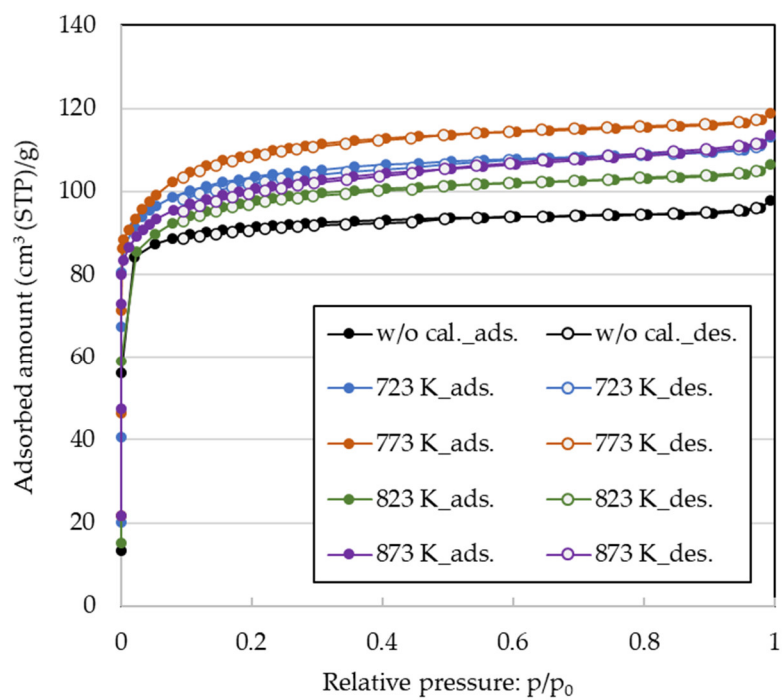

**Figure S1.** N<sub>2</sub> adsorption-desorption isotherms for 840NHA (MFI) at 77 K.

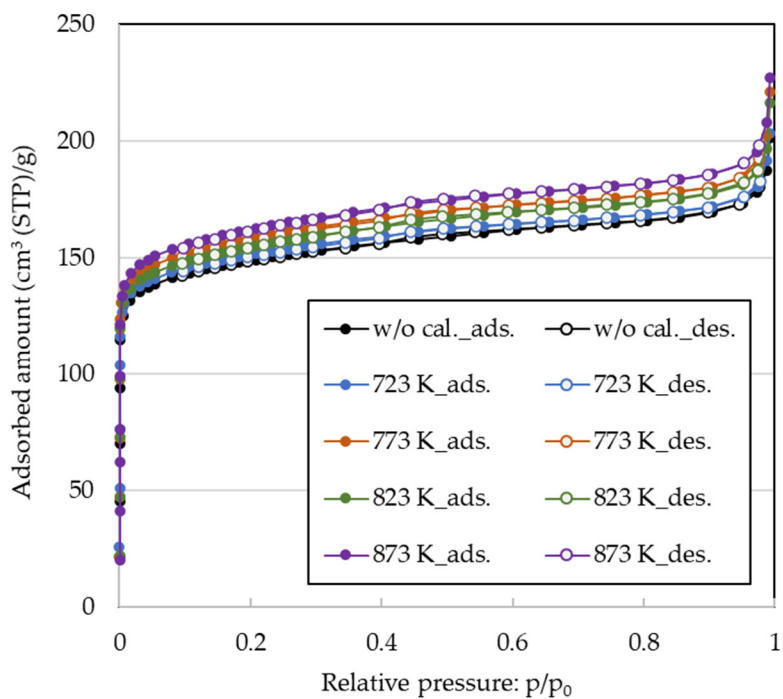

**Figure S2.** N<sub>2</sub> adsorption-desorption isotherms for 940HOA (BEA) at 77 K.

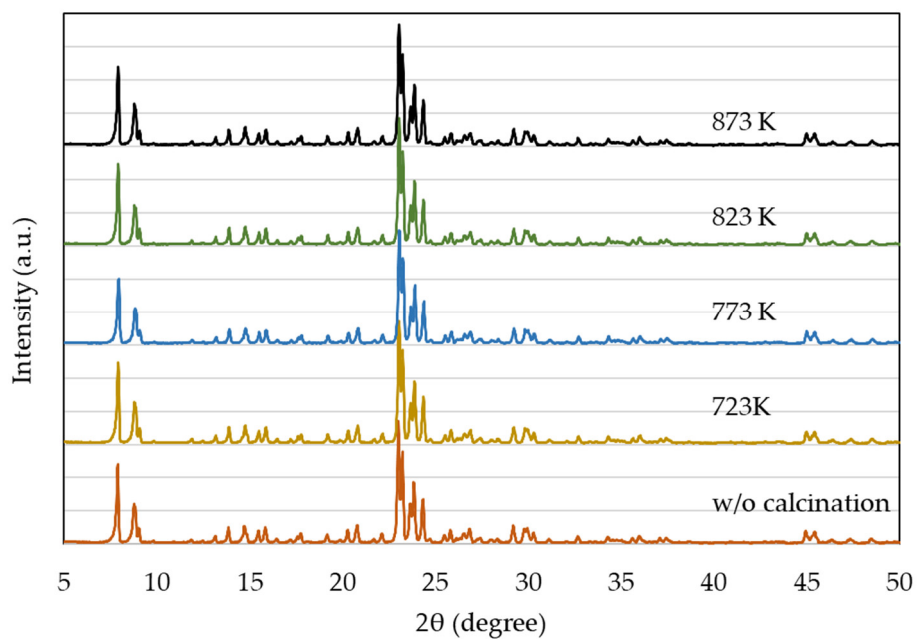

**Figure S3.** XRD patterns of 840NHA (MFI) at different calcination temperatures.

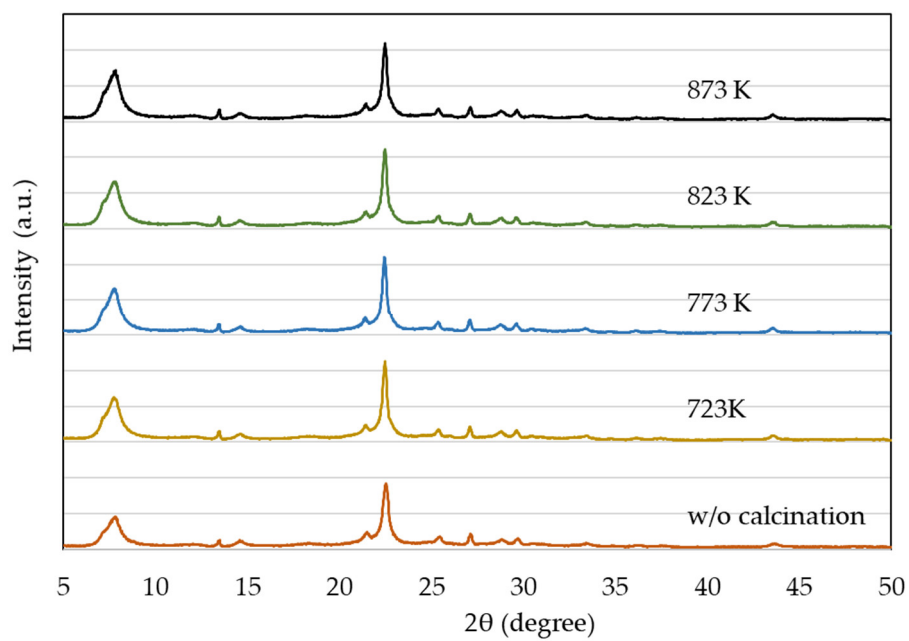

**Figure S4.** XRD patterns of 940HOA (BEA) at different calcination temperatures.

**Table S1.** Supplementary table for multiple regression analysis.

| Material           | Calcination<br>temp. (K) | Micro<br>surface<br>area<br>(m <sup>2</sup> g <sup>-1</sup> ) | External<br>area<br>(m <sup>2</sup> g <sup>-1</sup> ) | Total pore<br>volume<br>(cm <sup>3</sup> g <sup>-1</sup> ) | Micropore<br>volume<br>(cm <sup>3</sup> g <sup>-1</sup> ) | Weak<br>acid<br>(mmol/g) | Strong<br>acid<br>(mmol/g) | <i>n</i> -butene<br>(C-mol%) |
|--------------------|--------------------------|---------------------------------------------------------------|-------------------------------------------------------|------------------------------------------------------------|-----------------------------------------------------------|--------------------------|----------------------------|------------------------------|
|                    |                          | x <sub>1</sub>                                                | x <sub>2</sub>                                        | x <sub>3</sub>                                             | x <sub>4</sub>                                            | x <sub>5</sub>           | x <sub>6</sub>             | y                            |
| 720NHA             | 723                      | 352                                                           | 28                                                    | 0.37                                                       | 0.11                                                      | 1.358                    | 1.369                      | 22.3                         |
|                    | 773                      | 460                                                           | 27                                                    | 0.37                                                       | 0.14                                                      | 1.406                    | 1.373                      | 27.6                         |
|                    | 823                      | 436                                                           | 27                                                    | 0.33                                                       | 0.13                                                      | 1.386                    | 1.288                      | 26.7                         |
|                    | 873                      | 474                                                           | 29                                                    | 0.38                                                       | 0.14                                                      | 1.297                    | 0.999                      | 6.8                          |
| 840NHA             | 723                      | 519                                                           | 3                                                     | 0.17                                                       | 0.17                                                      | 0.774                    | 0.749                      | 18.7                         |
|                    | 773                      | 525                                                           | 4                                                     | 0.18                                                       | 0.17                                                      | 0.774                    | 0.747                      | 13.4                         |
|                    | 823                      | 458                                                           | 3                                                     | 0.16                                                       | 0.16                                                      | 0.760                    | 0.713                      | 13.0                         |
|                    | 873                      | 495                                                           | 8                                                     | 0.17                                                       | 0.16                                                      | 0.735                    | 0.675                      | 4.2                          |
| 940HOA             | 723                      | 758                                                           | 15                                                    | 0.30                                                       | 0.25                                                      | 0.498                    | 0.268                      | 7.8                          |
|                    | 773                      | 789                                                           | 16                                                    | 0.33                                                       | 0.26                                                      | 0.486                    | 0.255                      | 5.7                          |
|                    | 823                      | 768                                                           | 18                                                    | 0.32                                                       | 0.25                                                      | 0.463                    | 0.243                      | 6.9                          |
|                    | 873                      | 804                                                           | 19                                                    | 0.34                                                       | 0.26                                                      | 0.469                    | 0.231                      | 3.7                          |
| Average            |                          | 570                                                           | 17                                                    | 0.29                                                       | 0.18                                                      | 0.867                    | 0.743                      | 13.1                         |
| Standard deviation |                          | 162                                                           | 10                                                    | 0.09                                                       | 0.06                                                      | 0.386                    | 0.440                      | 8.7                          |

| Correlation coefficients (r <sub>ij</sub> ) |                |                |                |                |                |                |        |  |
|---------------------------------------------|----------------|----------------|----------------|----------------|----------------|----------------|--------|--|
| x <sub>i</sub>                              | x <sub>j</sub> |                |                |                |                |                |        |  |
|                                             | x <sub>1</sub> | x <sub>2</sub> | x <sub>3</sub> | x <sub>4</sub> | x <sub>5</sub> | x <sub>6</sub> | y      |  |
| x <sub>1</sub>                              | 1.000          |                |                |                |                |                | -0.676 |  |
| x <sub>2</sub>                              | -0.137         | 1.000          |                |                |                |                | 0.310  |  |
| x <sub>3</sub>                              | 0.128          | 0.953          | 1.000          |                |                |                | 0.156  |  |
| x <sub>4</sub>                              | 0.993          | -0.226         | 0.042          | 1.000          |                |                | -0.701 |  |
| x <sub>5</sub>                              | -0.836         | 0.618          | 0.395          | -0.887         | 1.000          |                | 0.766  |  |
| x <sub>6</sub>                              | -0.908         | 0.464          | 0.229          | -0.940         | 0.974          | 1.000          | 0.836  |  |
| y                                           | -0.676         | 0.310          | 0.156          | -0.701         | 0.766          | 0.836          | 1.000  |  |
